# Supplementary material
Source: PubMed Central journal article supplement (PMC7508052)
Supplement: mmc8.pdf [file mmc8.pdf]

| Raw file                                         | Scan  | Method       | Score  | m/z    | Protein | Site  |
|--------------------------------------------------|-------|--------------|--------|--------|---------|-------|
| 20190803_LUMOS_D3K_JML-SCL-IAH_ADPr_Tryp_Ctrl_04 | 10401 | FTMS; AI-ETD | 104.22 | 729.28 | PARP8   | C-332 |

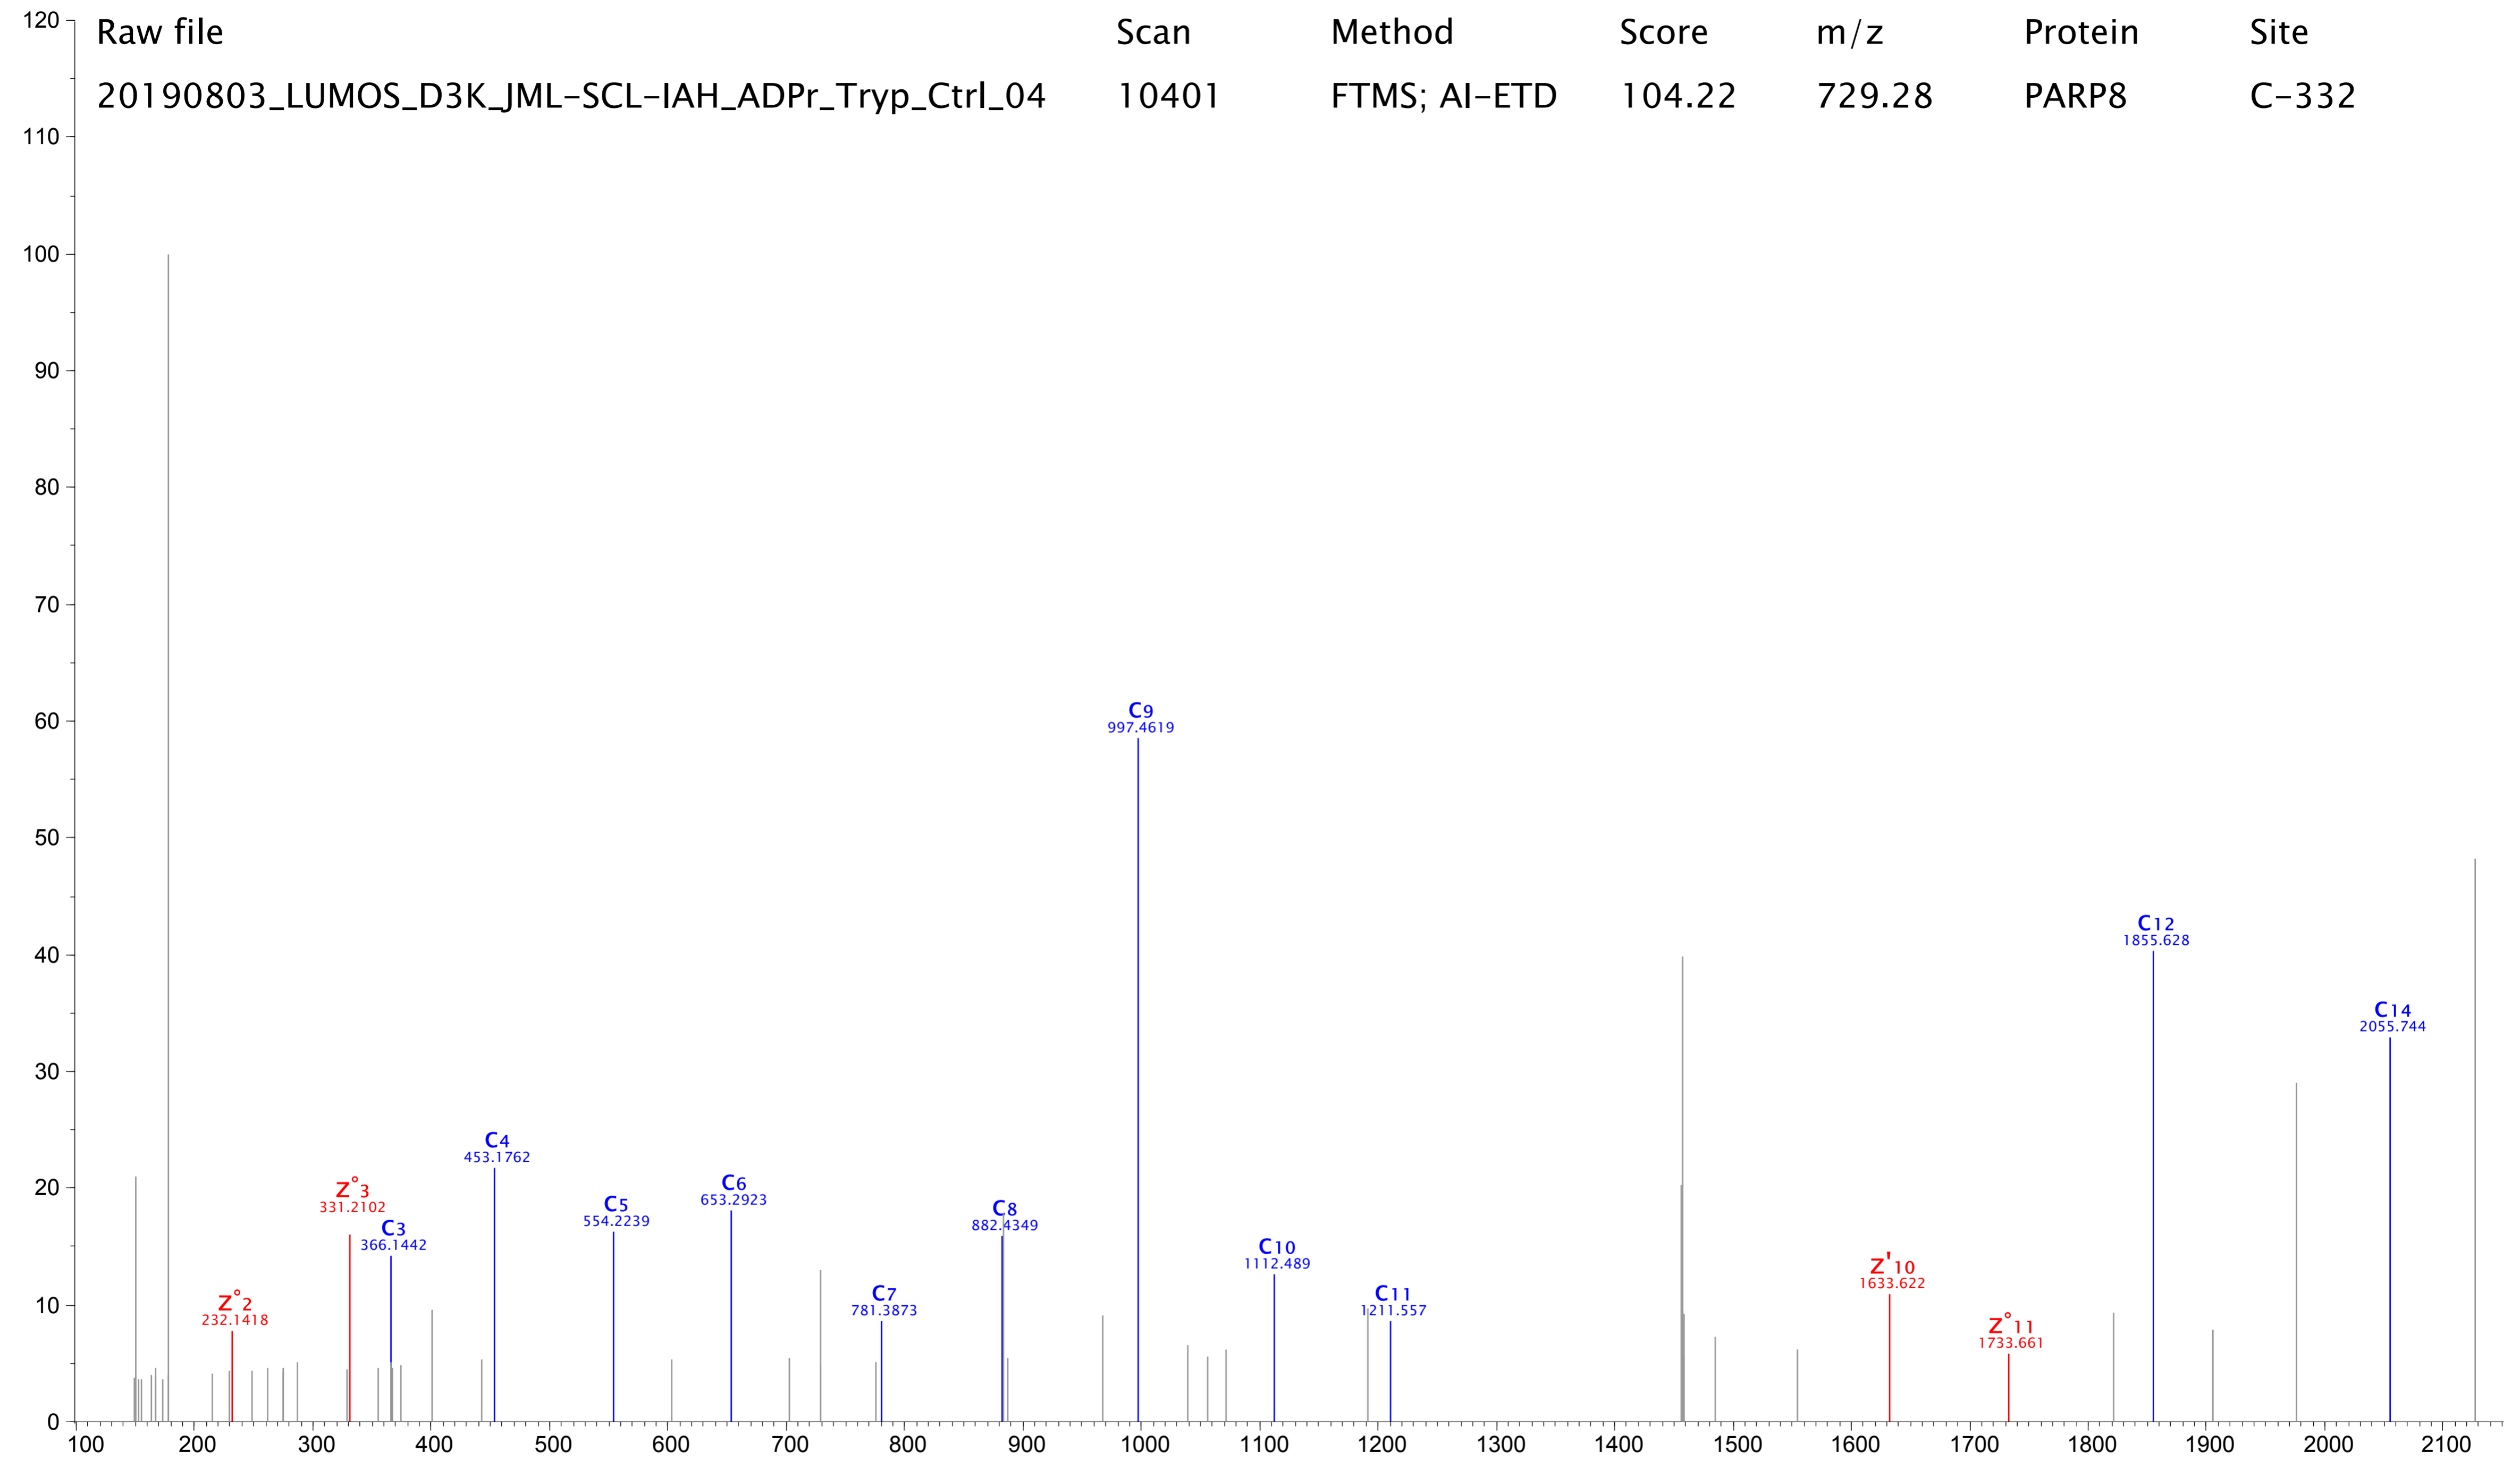

- T C S S T V K T D D V ADPr C V T K -

C<sub>3</sub> C<sub>4</sub> C<sub>5</sub> C<sub>6</sub> C<sub>7</sub> C<sub>8</sub> C<sub>9</sub> C<sub>10</sub> C<sub>11</sub> C<sub>12</sub> C<sub>14</sub>

Z<sup>o</sup><sub>11</sub> Z<sup>o</sup><sub>10</sub> Z<sup>o</sup><sub>3</sub> Z<sup>o</sup><sub>2</sub>

| Raw file                                         | Scan  | Method       | Score  | m/z    | Protein | Site  |
|--------------------------------------------------|-------|--------------|--------|--------|---------|-------|
| 20190803_LUMOS_D3K_JML-SCL-IAH_ADPr_Tryp_Ctrl_02 | 14387 | FTMS; AI-ETD | 128.85 | 671.81 | PARP8   | C-376 |

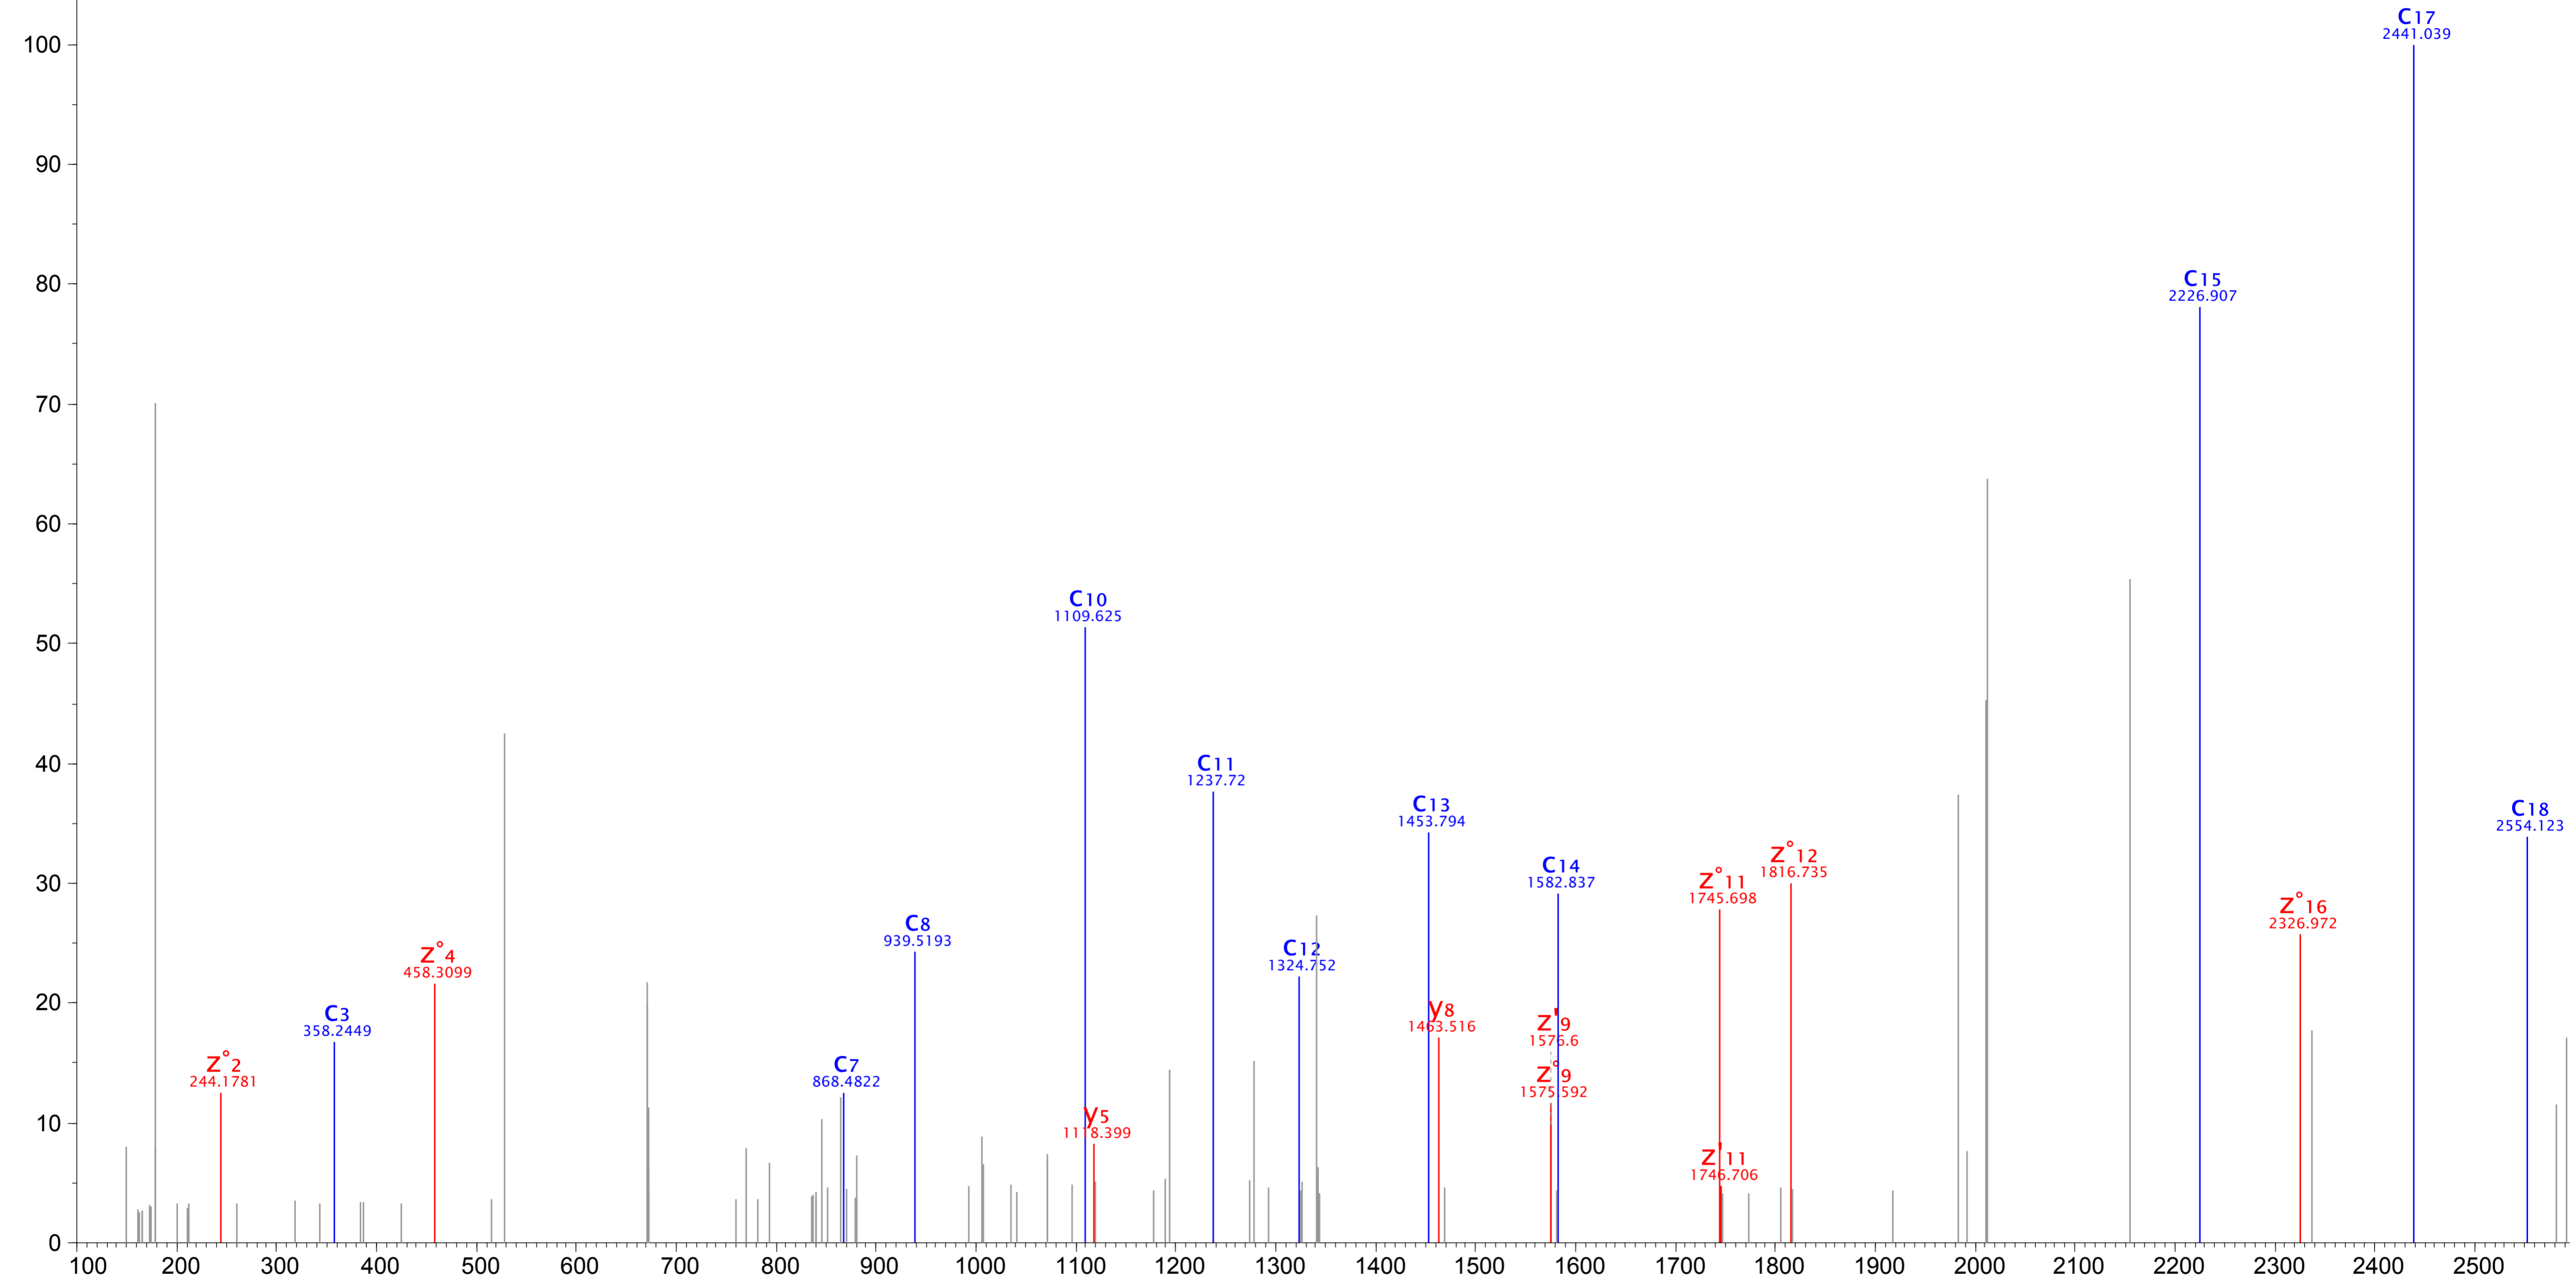

- L L N R P ca C P A A V K S E E ADPr L T L K -

C3 C7 C8 C10 C11 C12 C13 C14 C15 C17 C18

Z<sup>16</sup> Z<sup>12</sup> Z<sup>11</sup> Z<sup>9</sup> Y8 Z<sup>9</sup> Y5 Z<sup>11</sup> Z<sup>12</sup> Z<sup>4</sup> Z<sup>2</sup>

| Raw file                                         | Scan | Method       | Score  | m/z    | Protein | Site  |
|--------------------------------------------------|------|--------------|--------|--------|---------|-------|
| 20190803_LUMOS_D3K_JML-SCL-IAH_ADPr_Tryp_Ctrl_01 | 8001 | FTMS; AI-ETD | 199.68 | 656.26 | PARP8   | C-395 |

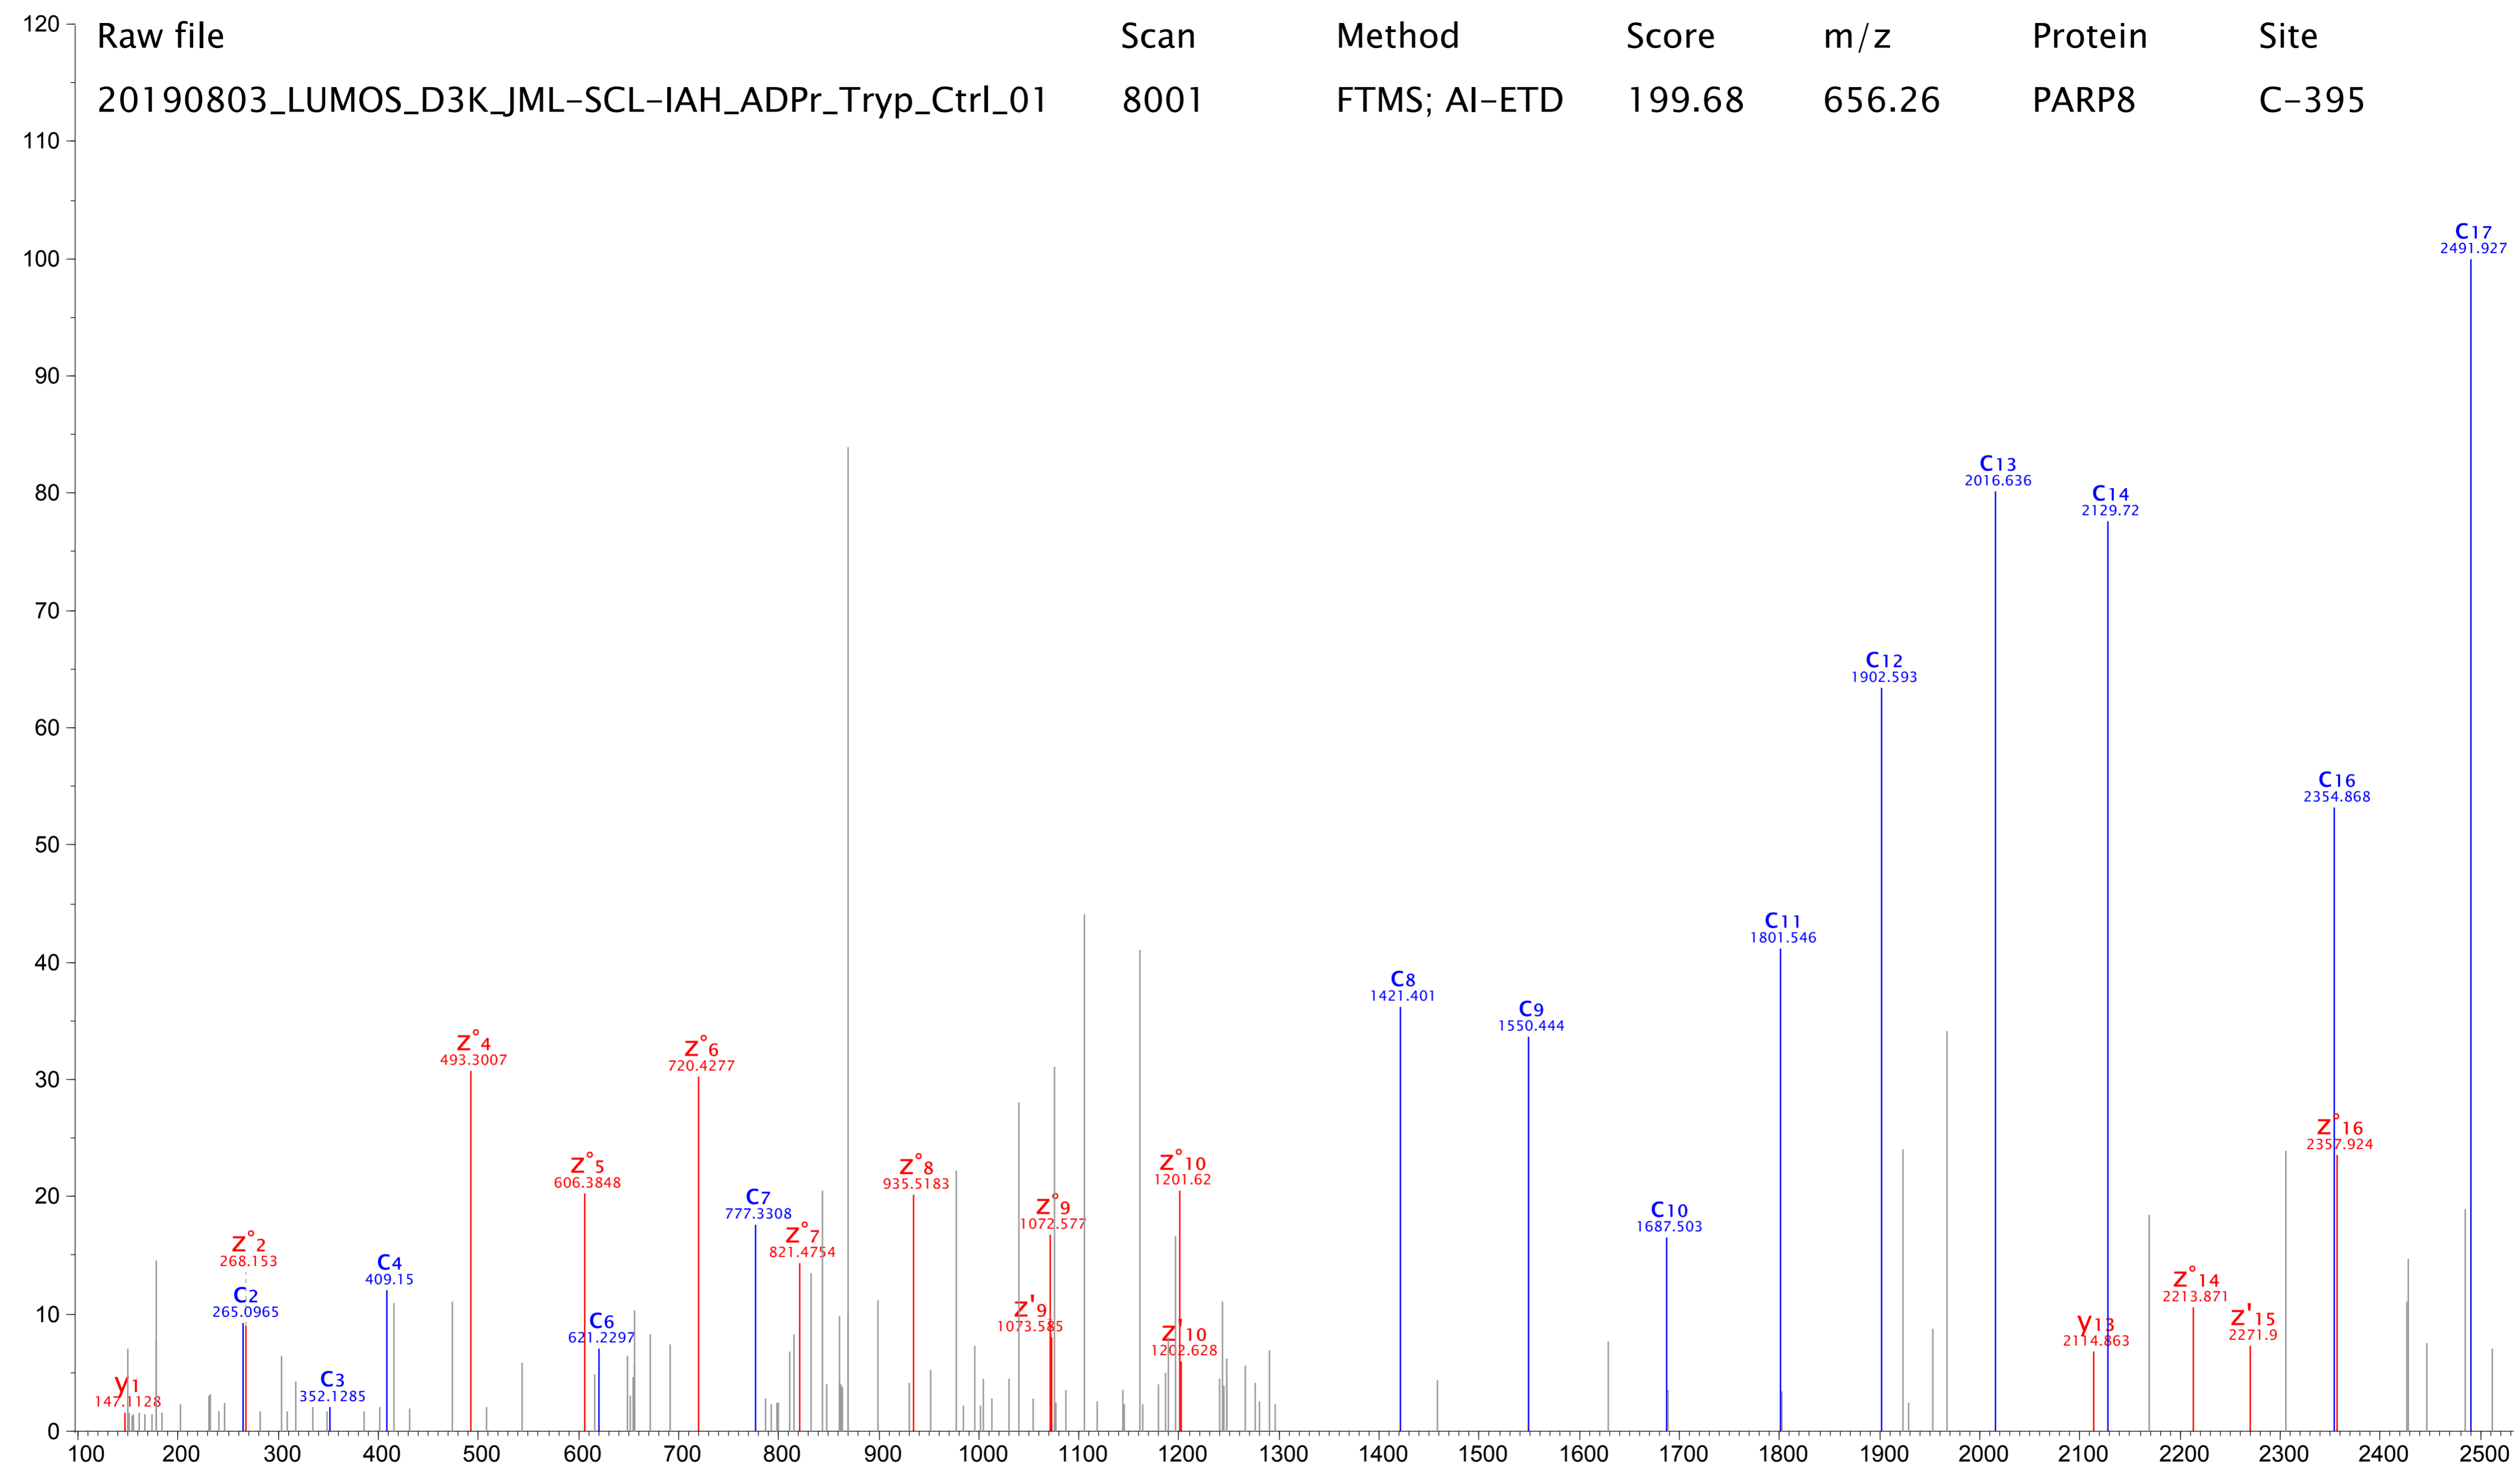

- S ca C2 Z<sup>16</sup> S C3 Z<sup>15</sup> G C4 Z<sup>14</sup> D Y<sup>13</sup> P C6 R C7 ADPr C8 Z<sup>10</sup> E C9 Z<sup>9</sup> H C10 Z<sup>8</sup> N C11 Z<sup>7</sup> T C12 Z<sup>6</sup> N C13 Z<sup>5</sup> L C14 Z<sup>4</sup> K C16 P C17 H C17 y1 K -

| Raw file                                         | Scan  | Method       | Score | m/z    | Protein | Site |
|--------------------------------------------------|-------|--------------|-------|--------|---------|------|
| 20190803_LUMOS_D3K_JML-SCL-IAH_ADPr_Tryp_Ctrl_01 | 18916 | FTMS; AI-ETD | 80.23 | 743.65 | PARP14  | Y-59 |

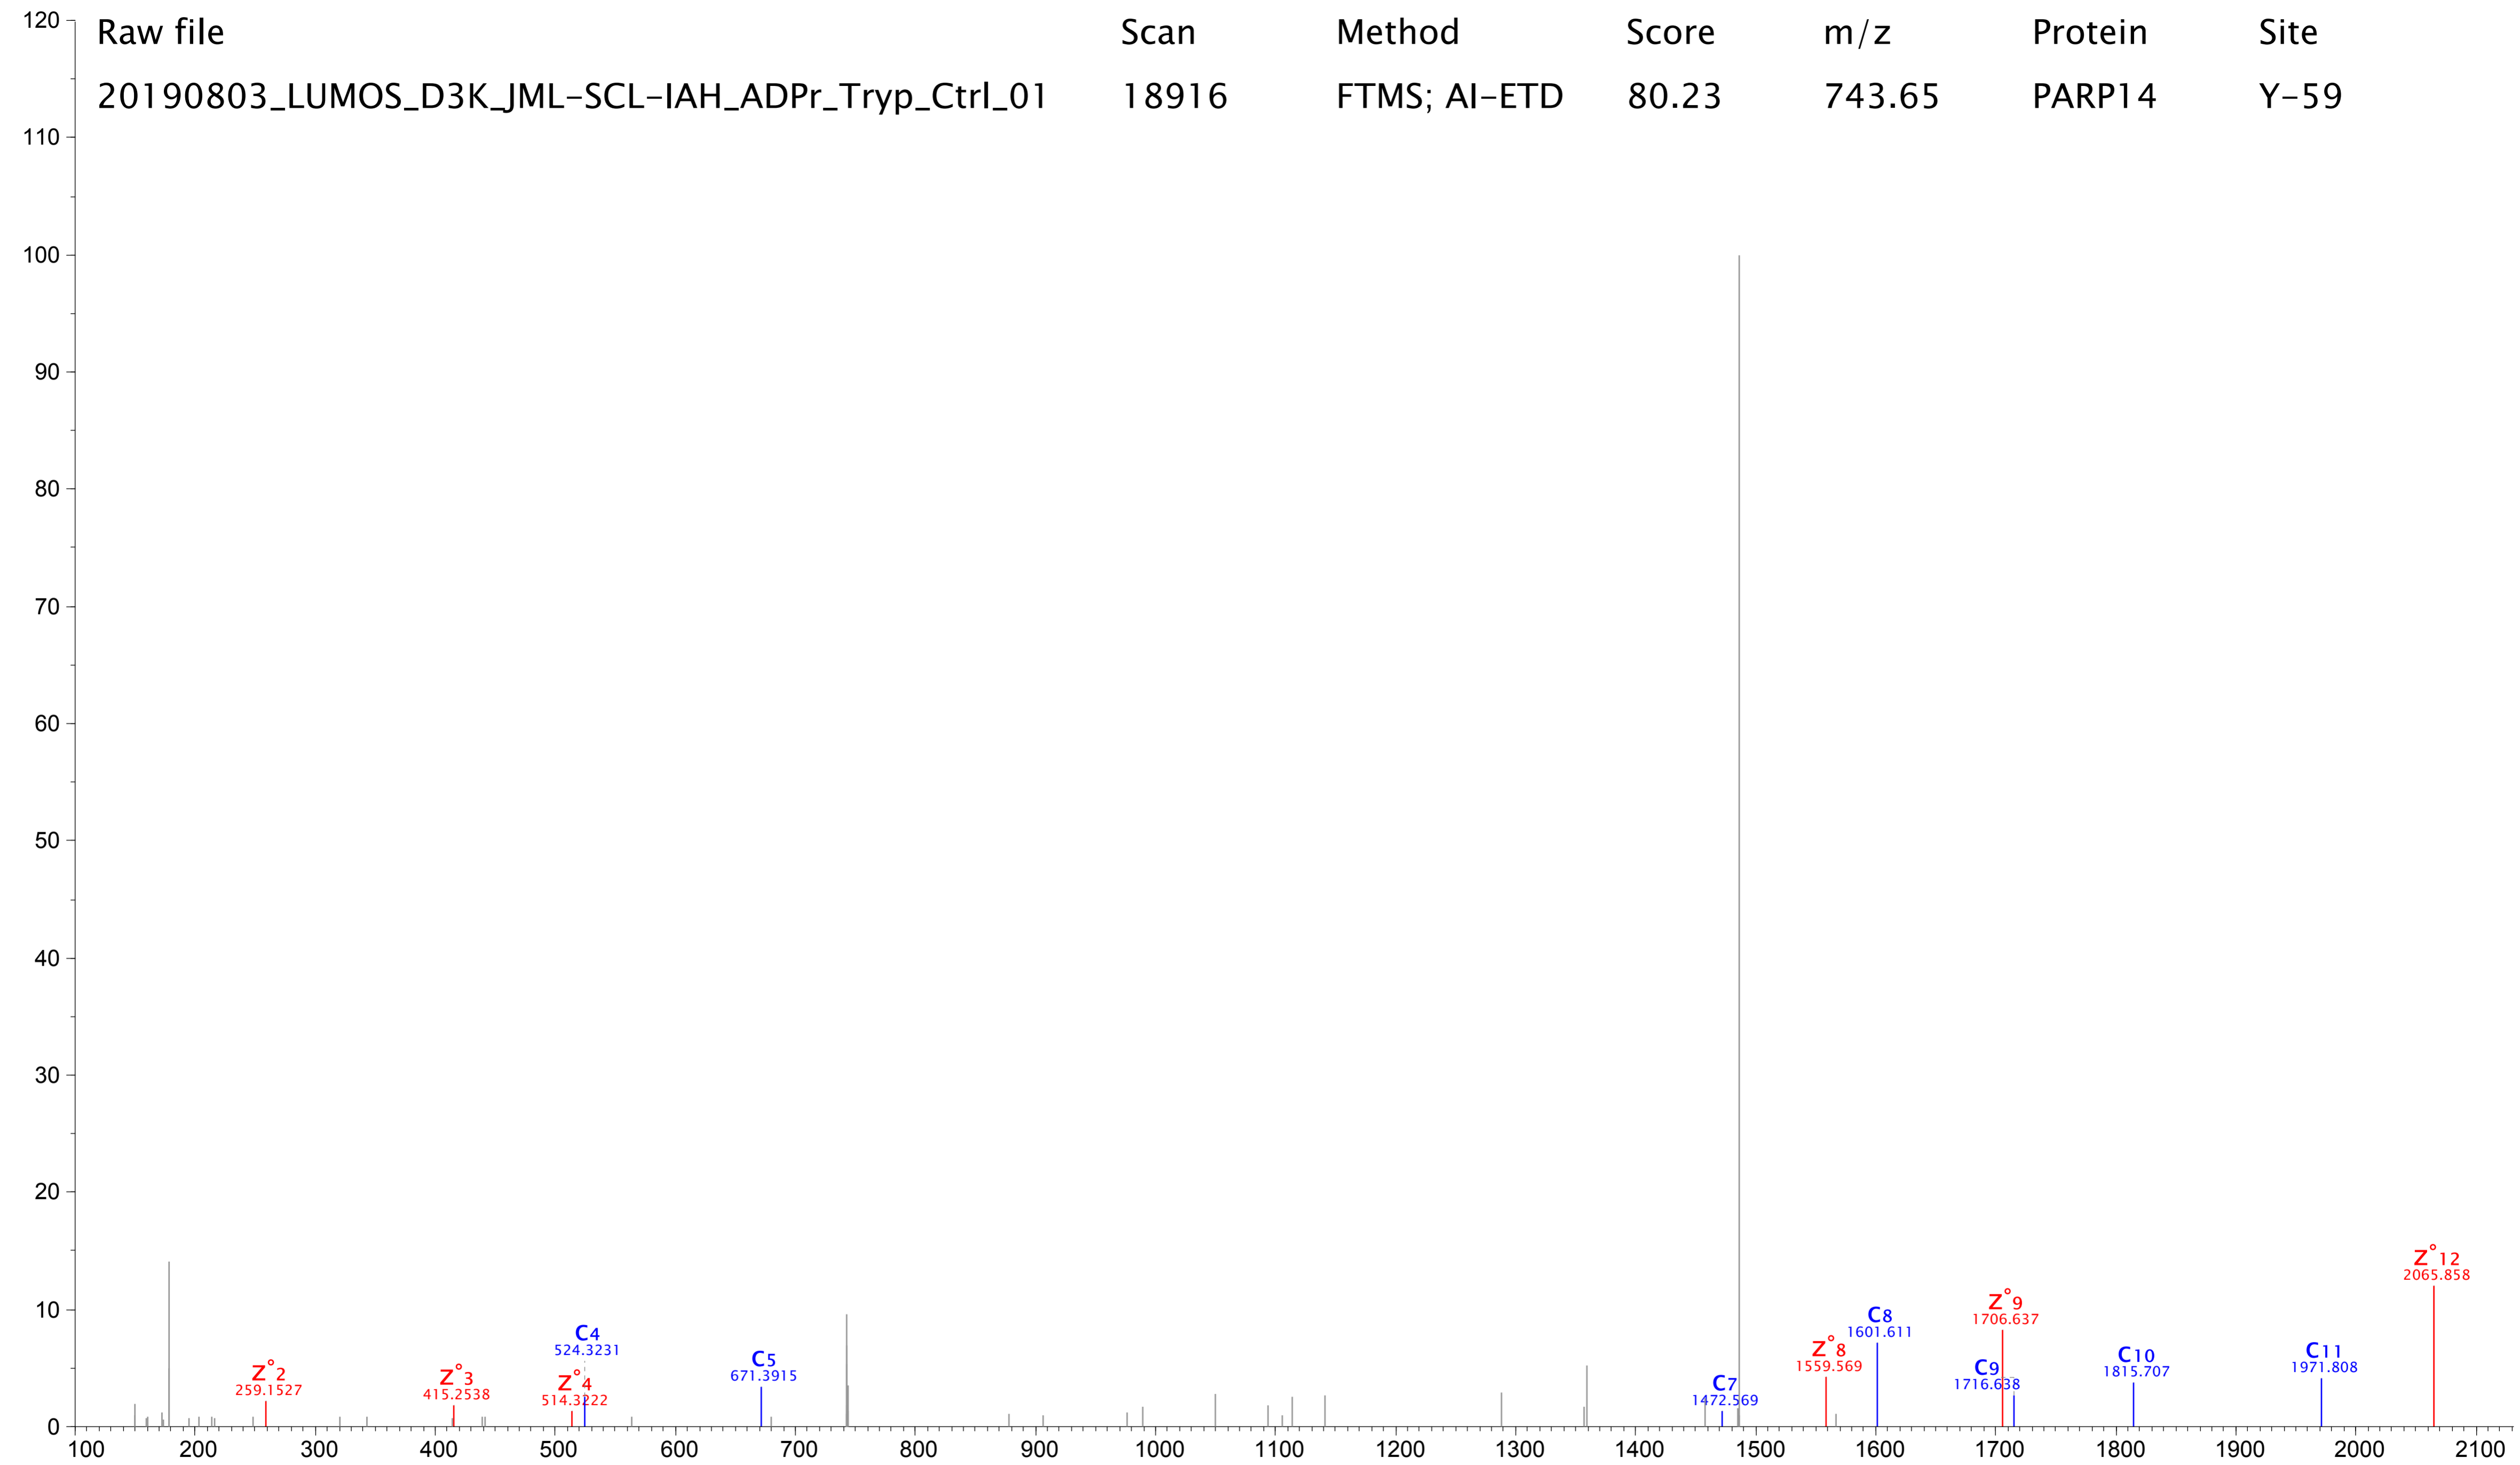

- F L V F F ADPr Y P E D V R Q K -

C<sup>4</sup> C<sup>5</sup> C<sup>7</sup> C<sup>8</sup> C<sup>9</sup> C<sup>10</sup> C<sup>11</sup>

Z<sup>12</sup> Z<sup>9</sup> Z<sup>8</sup> Z<sup>4</sup> Z<sup>3</sup> Z<sup>2</sup>

| Raw file                                         | Scan  | Method       | Score | m/z    | Protein | Site  |
|--------------------------------------------------|-------|--------------|-------|--------|---------|-------|
| 20190803_LUMOS_D3K_JML-SCL-IAH_ADPr_Tryp_Ctrl_04 | 16004 | FTMS; AI-ETD | 93.1  | 823.35 | PARP14  | Y-895 |

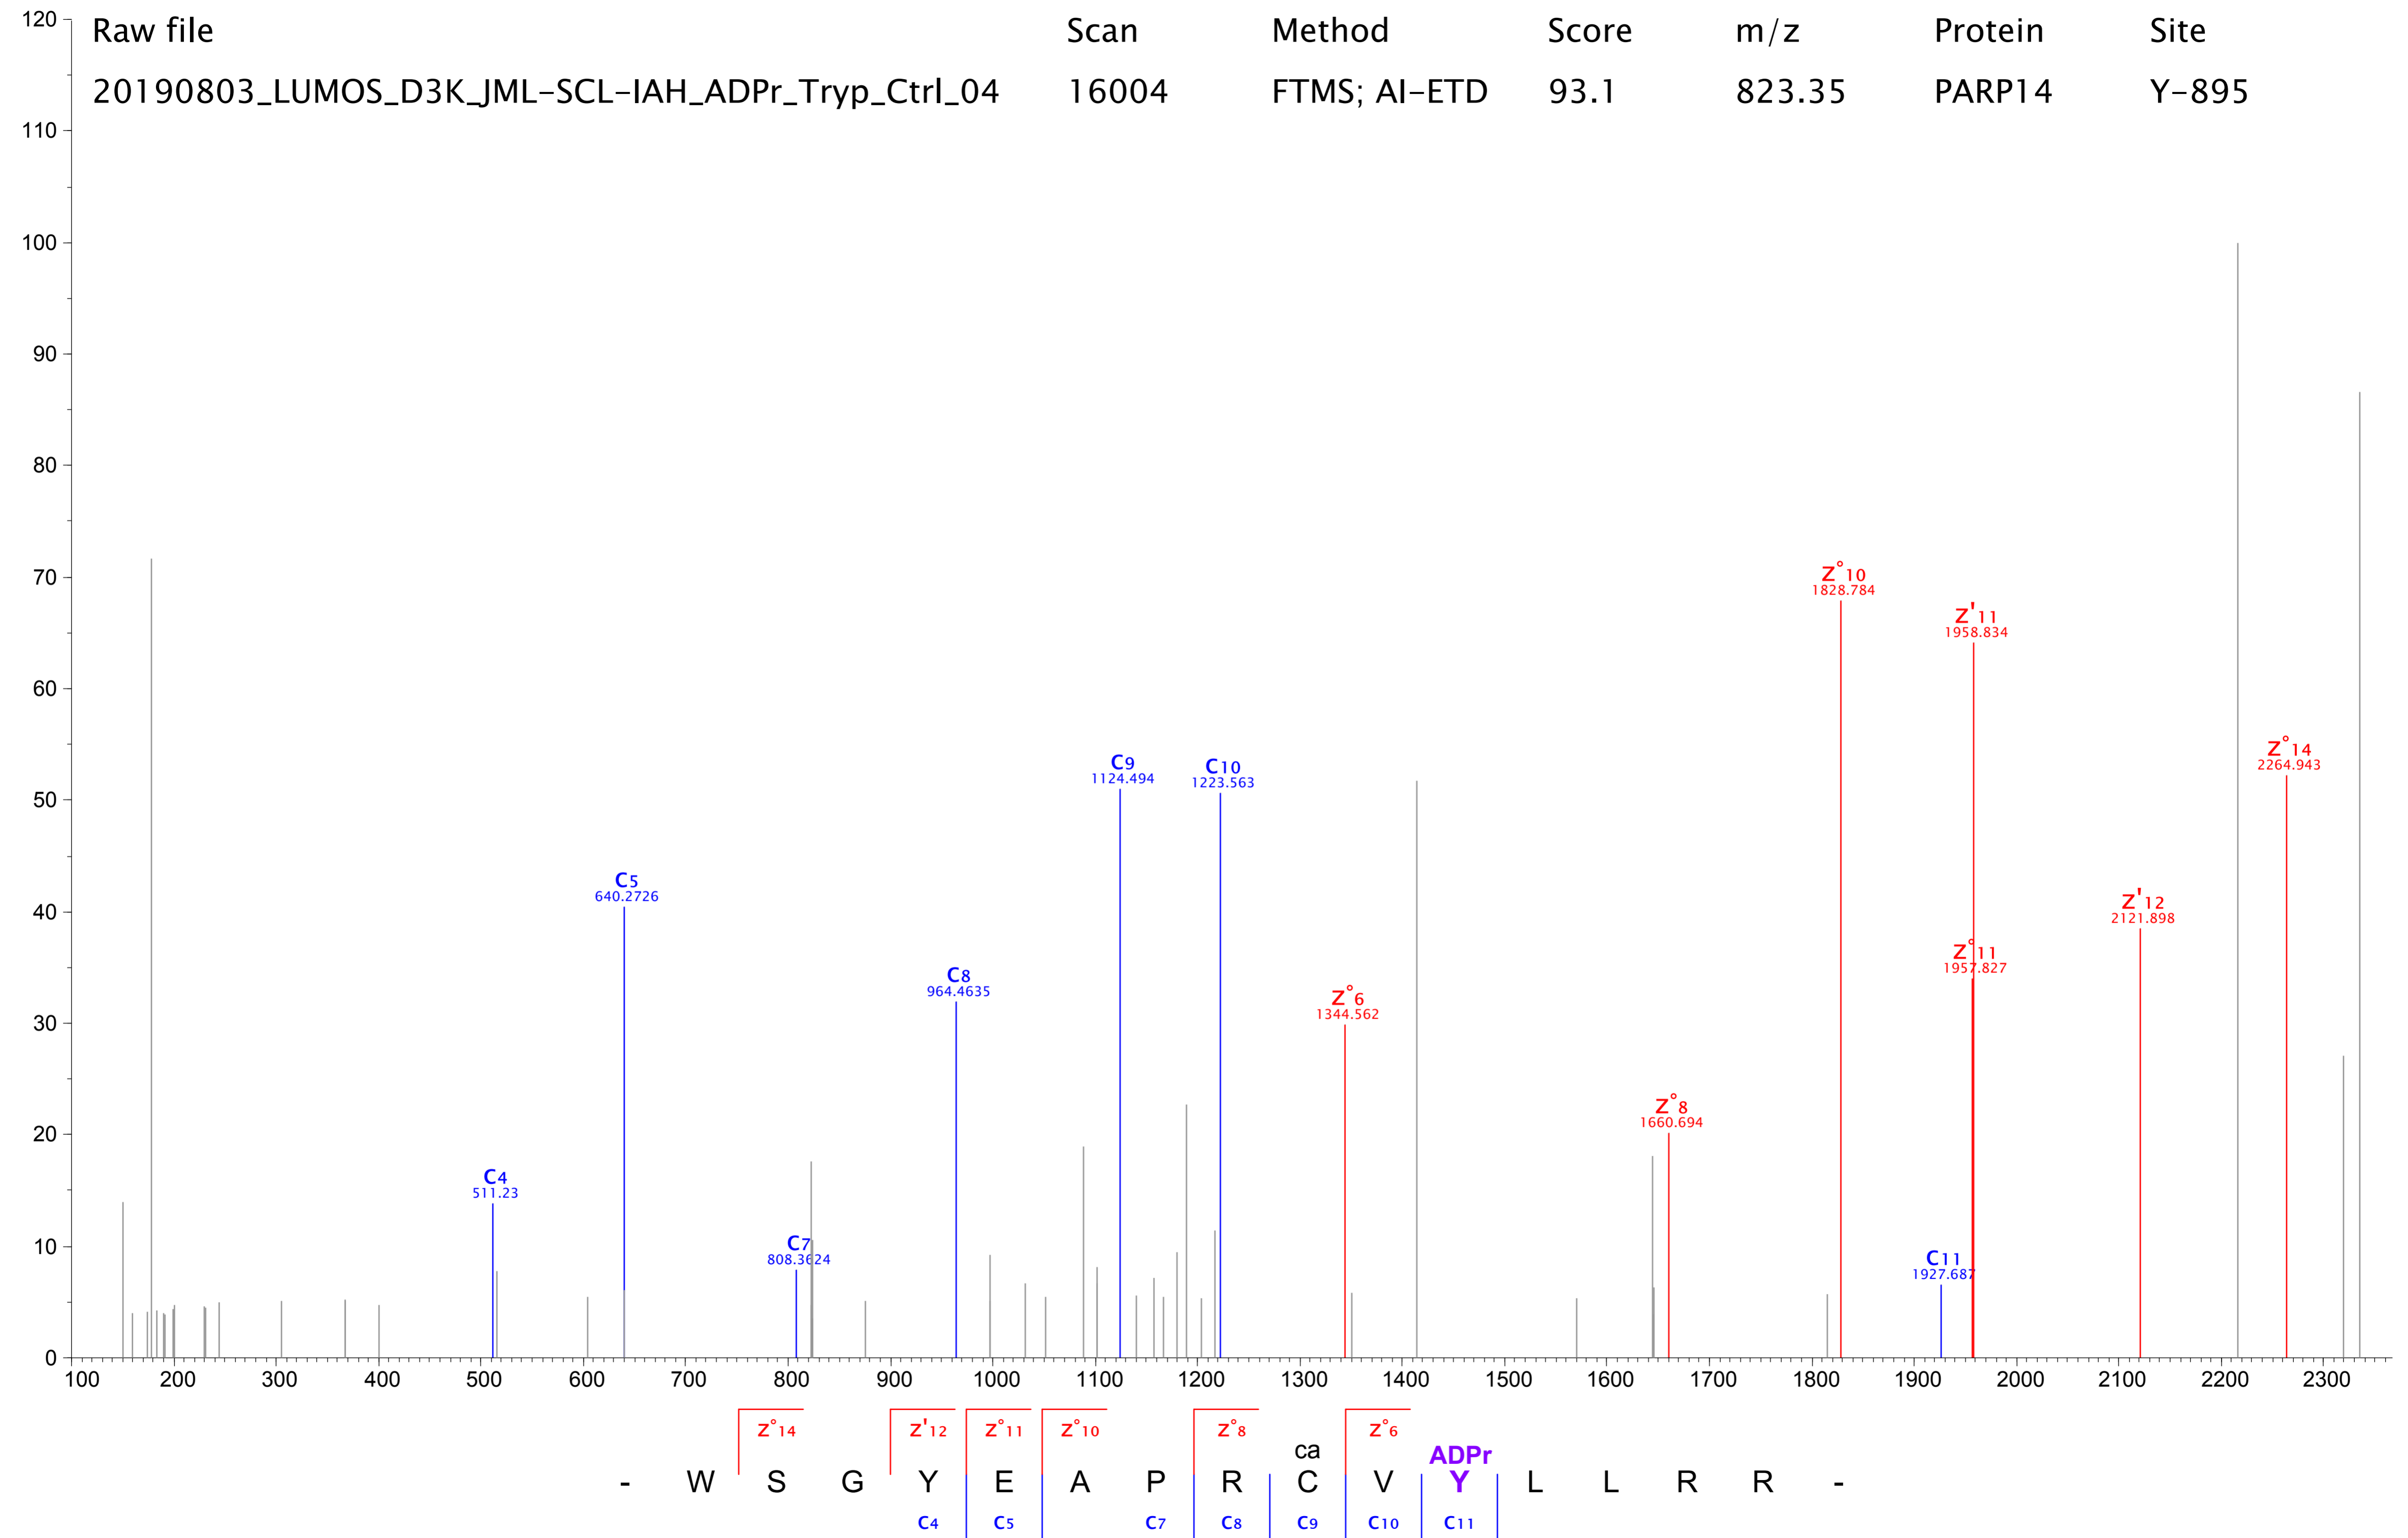

| Raw file                                         | Scan  | Method       | Score | m/z    | Protein | Site   |
|--------------------------------------------------|-------|--------------|-------|--------|---------|--------|
| 20190803_LUMOS_D3K_JML-SCL-IAH_ADPr_Tryp_Ctrl_04 | 16648 | FTMS; AI-ETD | 91.32 | 637.27 | PARP14  | Y-1088 |

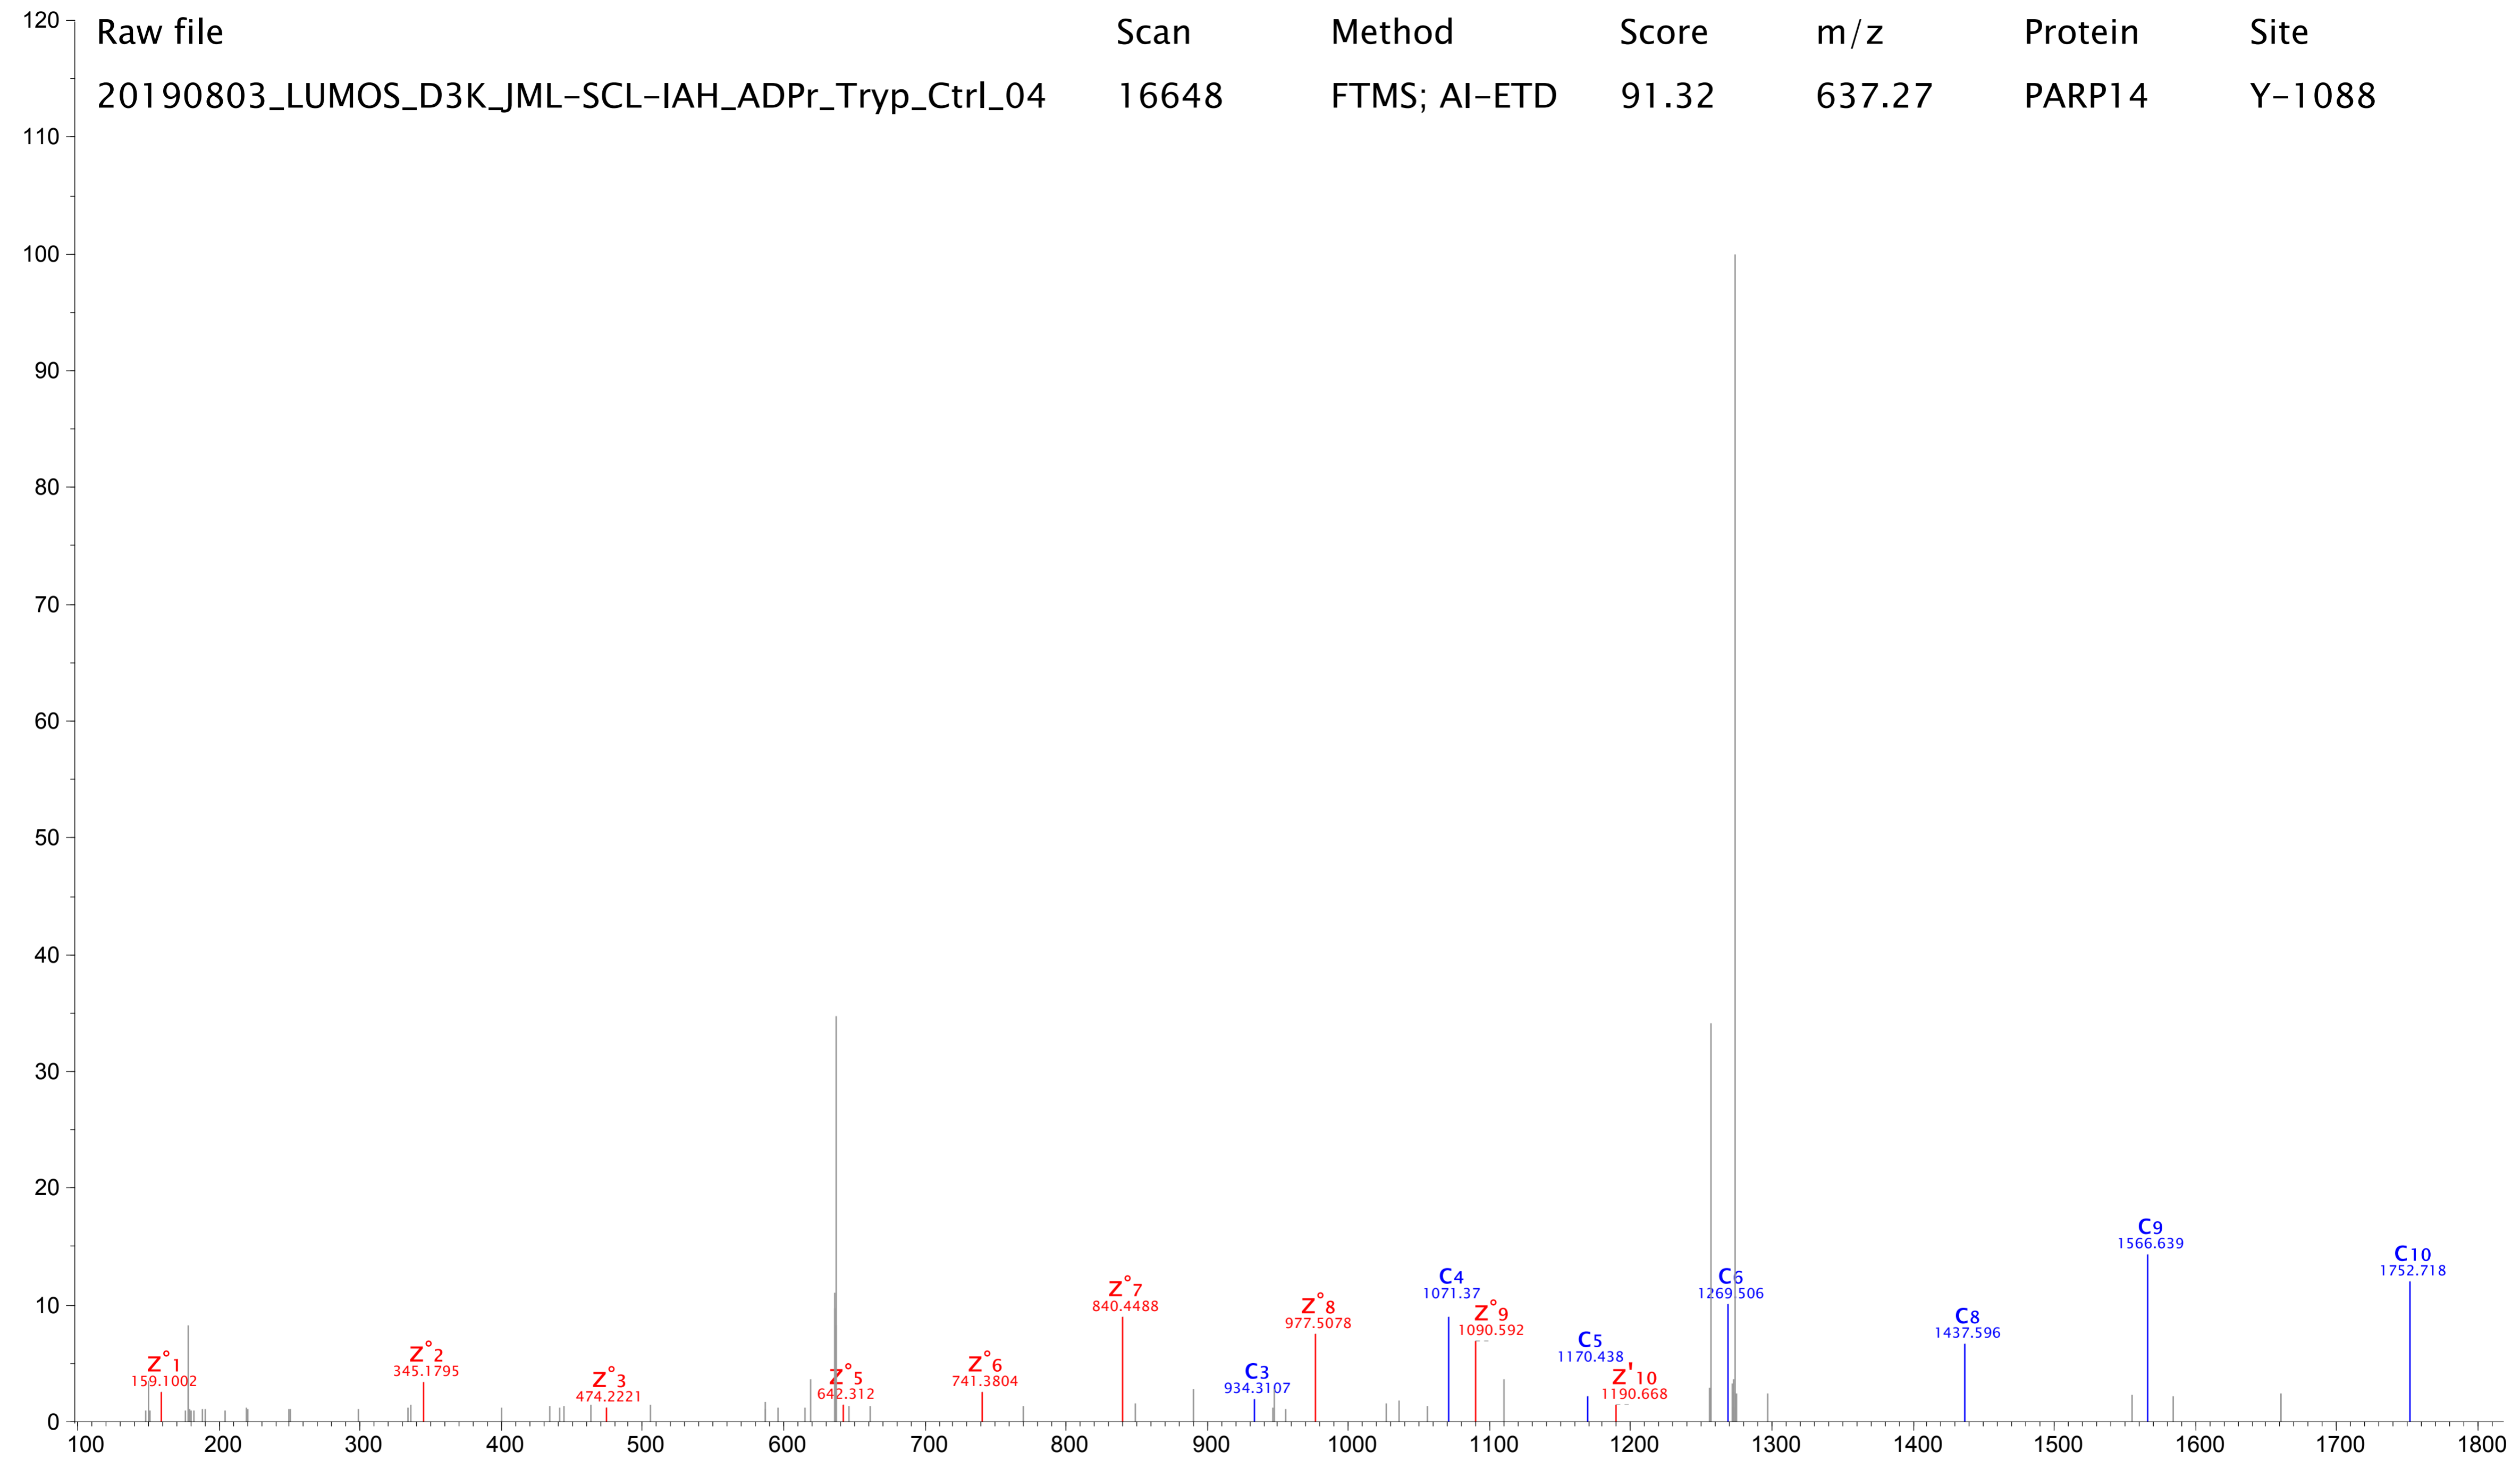

ADPr  
Y

|   |                 |                |                |                |                |                |                |                |                 |                |   |
|---|-----------------|----------------|----------------|----------------|----------------|----------------|----------------|----------------|-----------------|----------------|---|
| - | V               | L              | H              | V              | V              | A              | P              | E              | W               | R              | - |
|   | Z <sup>10</sup> | Z <sup>9</sup> | Z <sup>8</sup> | Z <sup>7</sup> | Z <sup>6</sup> | Z <sup>5</sup> |                | Z <sup>3</sup> | Z <sup>2</sup>  | Z <sup>1</sup> |   |
|   | C <sup>3</sup>  | C <sup>4</sup> | C <sup>5</sup> | C <sup>6</sup> |                |                | C <sup>8</sup> | C <sup>9</sup> | C <sup>10</sup> |                |   |
